# Supplementary material for: Photochemistry using a host–guest charge transfer paradigm: DMABN as a dynamical probe of ground and excited states
Source: Royal Society of Chemistry journal article supplement (doi:10.1039/d1cp00370d), 2021-01-01
Supplement: d1cp00370d1.pdf [file d1cp00370d1.pdf]

## **Supporting Information**

# Photochemistry using Host-Guest Charge Transfer Paradigm: DMABN as a Dynamical Probe of Ground and Excited States

Rahul Gera and Jyotishman Dasgupta<sup>†\*</sup>

<sup>†</sup>Department of Chemical Sciences, Tata Institute of Fundamental Research, Mumbai 400005, India.

\*Email: [dasgupta@tifr.res.in](mailto:dasgupta@tifr.res.in)

## **Contents:**

|                                                                                  |        |
|----------------------------------------------------------------------------------|--------|
| <b>1. Materials and Methods</b>                                                  | S2- S3 |
| <b>2. The synthesis of Pd<sub>6</sub>L<sub>4</sub> cage</b>                      | S4     |
| <b>3. The synthesis of inclusion complex DMABN ⊂ Cage</b>                        | S4     |
| <b>4. Structural Information from NMR: Through Space proton-proton distances</b> | S5-S10 |
| <b>5. Time-evolution of the broad Visible excited state absorption signal</b>    | S11    |
| <b>6. Kinetics of excited state absorption signal in Visible</b>                 | S12    |
| <b>7. Time-evolution of the broad NIR excited state absorption signal</b>        | S13    |
| <b>8. Kinetics of excited state absorption signal in NIR</b>                     | S14    |

## **Supplementary Figures:**

|                                                                                                                                                     |     |
|-----------------------------------------------------------------------------------------------------------------------------------------------------|-----|
| <b>S1</b> : 1D- NOE difference spectrum for DMABN ⊂ cage obtained by saturating proton Hb of DMABN                                                  | S6  |
| <b>S2</b> : 1D- NOE difference spectrum for DMABN ⊂ cage obtained by saturating proton Me of DMABN                                                  | S7  |
| <b>S3</b> : 1D- NOE difference spectrum for DMABN ⊂ cage obtained by saturating proton Me of DMABN                                                  | S8  |
| <b>S4</b> : 1D- NOE difference spectrum for DMABN ⊂ cage obtained by saturating proton Me of DMABN                                                  | S9  |
| <b>S5</b> : Time-evolution of the broad NIR excited state absorption signal in DMABN ⊂ Cage after excitation with $\lambda_{\text{pump}} = 490$ nm  | S11 |
| <b>S6</b> : Kinetics of excited state absorption signal for DMABN ⊂ Cage at 545 nm after excitation with $\lambda_{\text{pump}} = 490$ nm.          | S12 |
| <b>S7</b> : Time-evolution of the broad NIR excited state absorption signal in DMABN ⊂ Cage after excitation with $\lambda_{\text{pump}} = 490$ nm. | S13 |
| <b>S8</b> : Kinetics of excited state absorption signal for DMABN ⊂ Cage at 880 nm after excitation with $\lambda_{\text{pump}} = 490$ nm.          | S14 |
| <b>S9</b> : Kinetics of excited state absorption feature at 952 nm for DMABN ⊂ cage after excitation with 490 nm pump pulse                         | S15 |

## **Supplementary Table:**

|                                                                                                          |     |
|----------------------------------------------------------------------------------------------------------|-----|
| <b>ST1:</b> Calculated distances between <sup>1</sup> H close in space using NOE difference spectroscopy | S10 |
|----------------------------------------------------------------------------------------------------------|-----|

## **1. Materials and Methods:**

Solvents and reagents were purchased from TCI Co., Ltd., S.D. Fine Chemicals and Sigma-Aldrich Co. D<sub>2</sub>O was acquired from Sigma-Aldrich Co, Inc. and used as supplied for the reactions and NMR measurements.

#### **NMR Measurements:**

<sup>1</sup>H and other 2D NMR spectra were recorded on Bruker (500 MHz, and 700 MHz) and Varian (600 MHz) spectrometer.

#### **Steady State Absorption Measurements:**

Absorption measurements were carried out in SPECORD 205 spectrophotometer. All the measurements were collected from 200-800 nm.

#### **Transient Measurements:**

Time-resolved transient measurements were carried out using an amplified laser source. 400 mW output from a mode-locked Ti:sapphire oscillator, MICRA-5, operating at 80 MHz repetition rate with a bandwidth of ~ 100 nm was amplified using a Coherent Legend Elite amplifier to provide a pulsed output of 4 W with spectral bandwidth of 65 nm and temporal bandwidth of 30 fs at 1 KHz repetition rate. The 4 mJ/pulse amplified output was split into two beams of equal power with help of a beam splitter. One portion is used for generation of a tunable output from an optical parametric amplifier (Coherent OPeraASolo). Other portion is used for generation of probe pulse, which is a white light continuum (~ 400 -1600 nm) generated using a 2 mm thick sapphire crystal. The optical parametric amplifier was used to generate 490 nm pump pulse which was attenuated to get an output of ~ 200-400 nJ per pulse that reaches the sample. The probe and the actinic pump pulses were focused, and overlapped temporally and spatially on the sample within a flow cuvette with 1 mm thickness. After passing through the sample, the probe photons were detected using a multichannel detector (Ultrafast Systems, Sarasota, Fl). Delay between pump and probe pulses were controlled using a motorized Newport translation stage that has a qudra-pass mirror assembly. 1 mm flow-cell with a 0.5 mm thick window was used for measurements. The flow rate was adjusted to replenish fresh sample and prevent photobleaching. NMR measurements were done pre- and post to the transient measurements to check the integrity of the host-guest complex. We detected no change of the samples after measurement. The samples in H<sub>2</sub>O were prepared along with the samples in D<sub>2</sub>O under identical conditions, and the measurements were performed under same settings to have a good comparison of the two datasets. The temporal instrument response is a Gaussian, with a FWHM of ~ 100 fs. The  $t = 0$  between pump and probe pulses was assigned using cross-correlation and comparison to solvent response but, it was allowed to vary freely while fitting the kinetics. Fitting of

kinetics was done using a multi-exponential model convoluted with the IRF using home written codes in IGOR 5 Pro. Singular value decomposition (SVD) of the transient data was carried out by Surface Explorer<sup>®</sup> software from Ultrafast Systems.

## 2. Synthesis of the cationic ( $\text{Pd}_6\text{L}_4$ ) cage:

Cage preparation can be found M. Fujita *et al. Nature* 1995, 378, 469 and R. Gera *et al. J. Am. Chem. Soc.* 2014, 136, 15909. Protons of ethylenediamine are in the aliphatic region at  $\delta$  2.90 ppm. Reported values for proton  $\text{H}_\alpha$  is  $\delta$  8.98 ppm as it is near to N ligated to  $\text{Pd}^{2+}$  thus downfield in comparison to  $\text{H}_\beta$  ( $\delta$  8.48 ppm).

$^1\text{H}$  – NMR of cage 1 (600MHz,  $\text{D}_2\text{O}$ , 298 K):  $\delta$  9.00 (d, pyridine- $\alpha$ ), 8.51 (d, pyridine- $\beta$ ), 2.90 (s, Hc).

## 3. Synthesis of the inclusion complex $\text{DMABN} \subset \text{cage}$ :

**DMABN  $\subset$  cage** inclusion complex was synthesized using the synthetic route reported by R. Gera *et al. J. Am. Chem. Soc.* **2014**, 136, 15909. Water insoluble DMABN solid (~ 19 mg) was stirred with a 5 ml solution of 2.5 mM cage 1 in  $\text{D}_2\text{O}$  for 1 h at room temperature. The colorless cage solution changes to orange. The solution was filtered through a 0.45  $\mu$  filter to remove the residual solid. Residual solid was removed by filtration using 0.45 micron filter. The host-guest complex in  $\text{H}_2\text{O}$  was synthesized simultaneously under identical conditions to avoid any ambiguity. The complex formation was confirmed by  $^1\text{H}$  NMR and stability was tested before and after each spectroscopic measurement.  $^1\text{H}$ –NMR of  $\text{DMABN} \subset \text{Cage}$  (500MHz,  $\text{D}_2\text{O}$ , 298 K):  $\delta$  9.27 (d, pyridine- $\alpha$ , Cage), 8.65 (d, pyridine- $\beta$ , Cage),  $\delta$  5.24 (d,  $\text{H}_a$ , DMABN),  $\delta$  4.94 (d,  $\text{H}_b$ , DMABN),  $\delta$  2.94 (s,  $\text{H}_c$ , Cage),  $\delta$  1.40 (s, Me, DMABN); [Inset DMABN free in solution, (600 MHz,  $\text{CDCl}_3$ , 298 K):  $\delta$  7.46 (d,  $\text{H}_a$ , DMABN),  $\delta$  6.64 (d,  $\text{H}_b$ , DMABN),  $\delta$  3.03 (s, Me, DMABN) ].

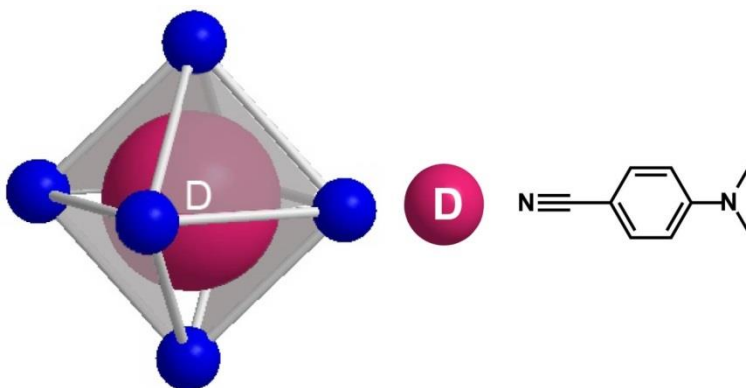

#### 4. Structural Information from NMR: Through Space proton-proton distances

These measurements were carried out on 700 MHz BRUKER NMR spectrometer at room temperature.

A proton pairs (I and S) give rise to NOE intensity when present close in space ( $\sim 4 - 5 \text{ \AA}$ ), for a given mixing time. NOE intensity is proportional to the I-S cross relaxation rate ( $\sigma_{IS}$ )

$\eta_{IS}$  = intensity of the NOE between I and S,  $\tau_m$  is experimental mixing time.

$$\eta_{IS} = \sigma_{IS}\tau_m$$

Cross relaxation rate is proportional to the internuclear distances ( $r_{IS}^{-6}$ ) described by

$$\sigma_{IS} = kr_{IS}^{-6}$$

Here,

$$k = \left(\frac{\mu_0}{4\pi}\right) \frac{\hbar^2\gamma^4}{10} \left(\frac{6\tau_c}{1 + 4\omega^2\tau_c^2} - \tau_c\right)$$

$\mu_0, \gamma$ , and  $\omega$  is equivalent for a given experiment.

Selective saturation of a spin in a given transient 1D-NOESY spectrum would reflect in change of intensities of protons correlated to it in spatial proximity. Difference spectrum of an off-resonance spectrum with an on resonance saturation spectrum, will provide the information about protons correlated to each other in space. Assuming k is also constant, and then the ratio of the intensities of a pair of NOE signals  $\eta_{IS}$ :  $\eta_{I2S}$  within that spectrum can be proportional to their ratio of internuclear distances and this ratio will be independent of mixing time.

$$\frac{\eta_{I1S}}{\eta_{I2S}} = \frac{r_{I1S}^{-6}}{r_{I2S}^{-6}} \quad \dots (1)$$

**Distances were calculated using the nondispersive features in NOE difference spectrums.**

Distance calculation between Hb and Me - difference NOE spectrum of DMABN  $\subset$  Cage

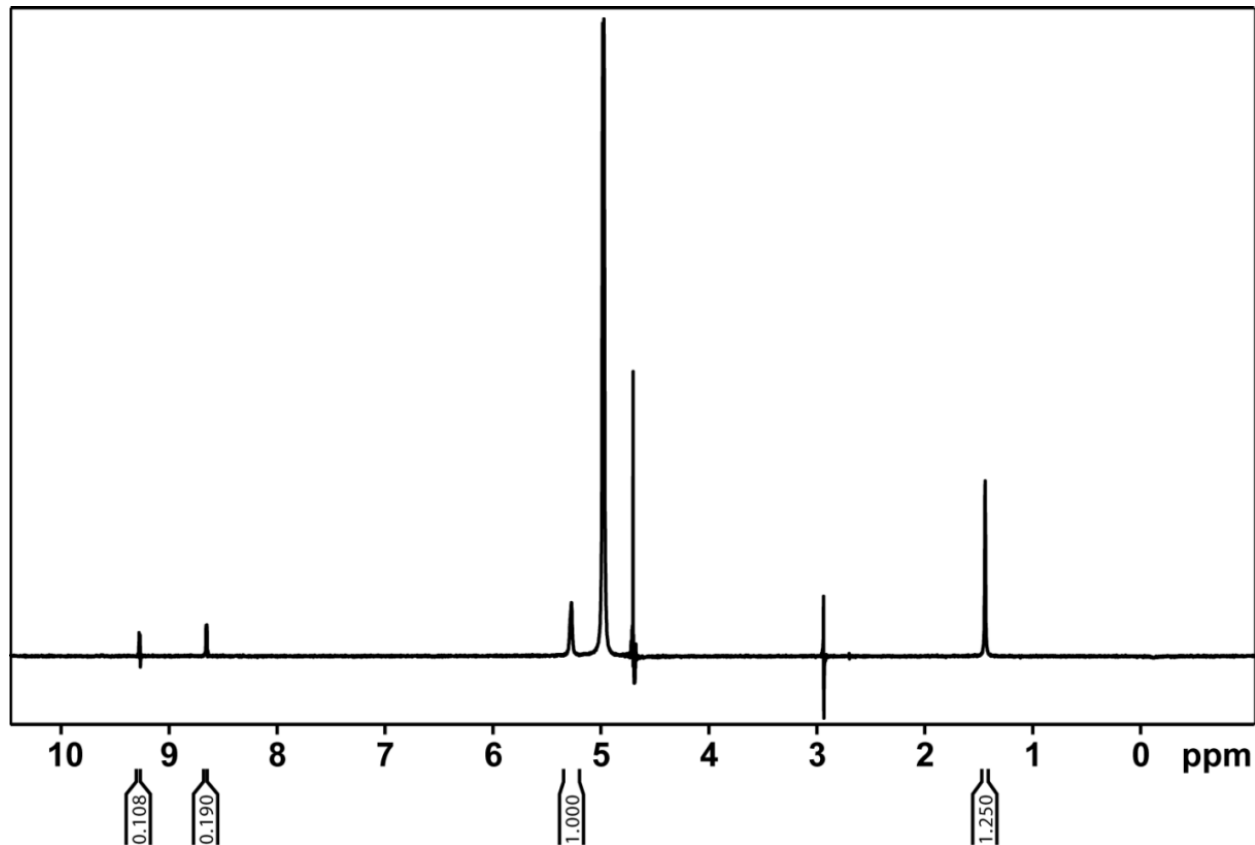

Figure S1. 1D- NOE difference spectrum for DMABN  $\subset$  cage obtained by saturating proton Hb of DMABN

Here, I = Hb, 1S = Ha, 2S = Me,  $\eta_{HbHa} = 1$ ,  $\eta_{HbMe} = 1.25$ ,  $r_{HbHa} = 2.3 \text{ \AA}$

$$\frac{\eta_{I1S}}{\eta_{I2S}} = \frac{r_{I1S}^{-6}}{r_{I2S}^{-6}} \Rightarrow \frac{\eta_{HbHa}}{\eta_{HbMe}} = \frac{r_{HbHa}^{-6}}{r_{HbMe}^{-6}} = \frac{1}{1.25} = \frac{2.3^{-6}}{r_{HbMe}^{-6}} \Rightarrow r_{HbMe} = 2.22 \text{ \AA}$$

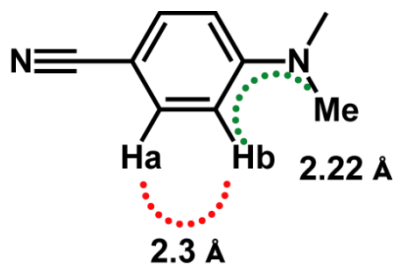

Distance calculation between Ha and Me - difference NOE spectrum of DMABN  $\subset$  Cage

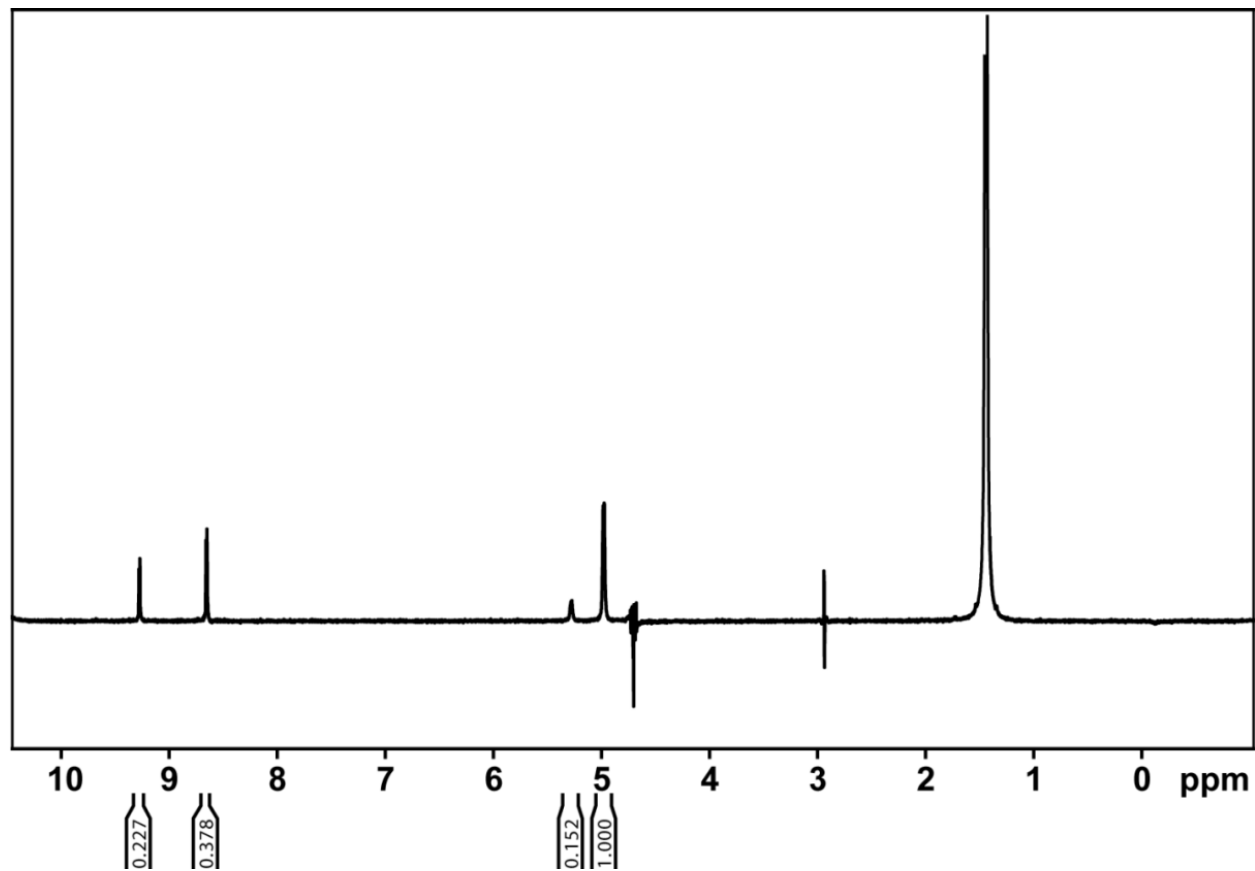

Figure S2. 1D- NOE difference spectrum for DMABN  $\subset$  cage obtained by saturating proton Me of DMABN

$$I = \text{Me}, 1S = \text{Hb}, 2S = \text{Ha}, \eta_{\text{MeHb}} = 1, \eta_{\text{MeHa}} = 0.152, r_{\text{MeHb}} = 2.22 \text{ \AA}$$

$$\frac{\eta_{\text{MeHb}}}{\eta_{\text{MeHa}}} = \frac{r_{\text{MeHb}}^{-6}}{r_{\text{MeHa}}^{-6}} = \frac{1}{0.152} = \frac{2.22^{-6}}{r_{\text{MeHa}}^{-6}} \Rightarrow r_{\text{MeHa}} = 3.04 \text{ \AA}$$

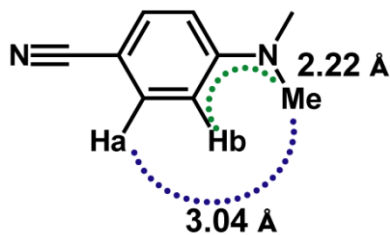



Distance calculation between H $\beta$  and Me - difference NOE spectrum of DMABN  $\subset$  Cage

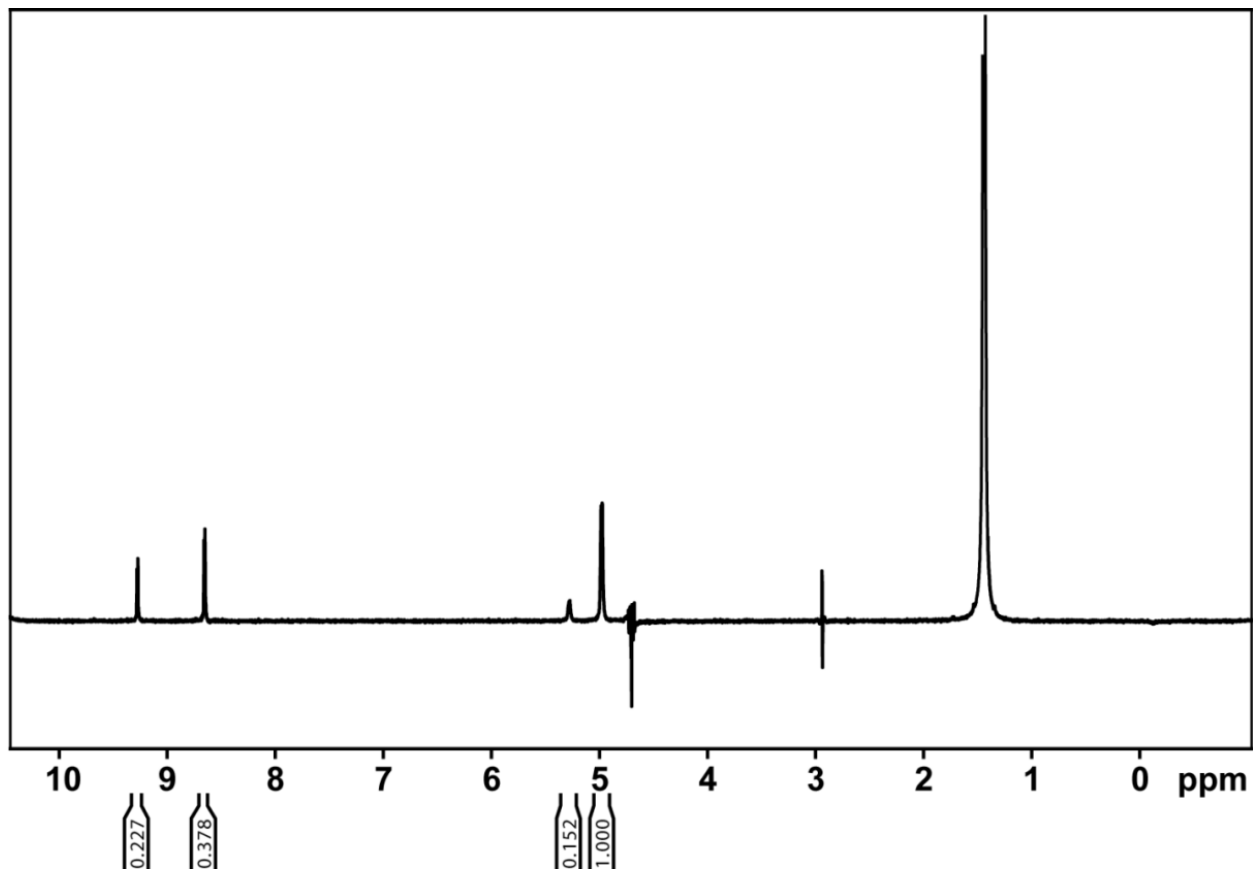

Figure S3. 1D- NOE difference spectrum for DMABN  $\subset$  cage obtained by saturating proton Me of DMABN

$$I = \text{Me}, 1S = \text{H}\beta, 2S = \text{H}\alpha, \eta_{\text{MeH}\beta} = 1, \eta_{\text{MeH}\alpha} = 0.378, r_{\text{MeH}\beta} = 2.22 \text{ \AA}$$

$$\frac{\eta_{\text{MeH}\beta}}{\eta_{\text{MeH}\alpha}} = \frac{r_{\text{MeH}\alpha}^{-6}}{r_{\text{MeH}\beta}^{-6}} = \frac{1}{0.378} = \frac{2.22^{-6}}{r_{\text{MeH}\alpha}^{-6}}$$

$$r_{\text{MeH}\alpha} = 2.61 \text{ \AA}$$

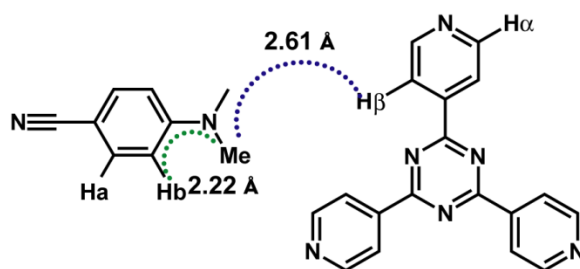

Distance calculation between H $\alpha$  and Me - difference NOE spectrum of DMABN  $\subset$  Cage



Figure S4. 1D- NOE difference spectrum for DMABN  $\subset$  cage obtained by saturating proton Me of DMABN

$$I = \text{Me}, 1S = \text{H}\beta, 2S = \text{H}\alpha, \eta_{\text{MeH}\beta} = 1, \eta_{\text{MeH}\alpha} = 0.378, r_{\text{MeH}\beta} = 2.22 \text{ \AA}$$

$$\frac{\eta_{\text{MeH}\beta}}{\eta_{\text{MeH}\alpha}} = \frac{r_{\text{MeH}\beta}^{-6}}{r_{\text{MeH}\alpha}^{-6}} = \frac{1}{0.227} = \frac{2.22^{-6}}{r_{\text{MeH}\alpha}^{-6}}$$

$$r_{\text{MeH}\alpha} = 2.75 \text{ \AA}$$

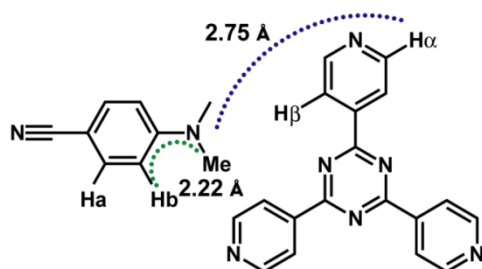

| Pair of protons                | Spatial distances (Å) |
|--------------------------------|-----------------------|
| Hb (DMABN) - Me (DMABN)        | 2.20                  |
| Ha (DMABN) - Me (DMABN)        | 3.04                  |
| Me (DMABN) - H $\alpha$ (Cage) | 2.75                  |
| Me (DMABN) - H $\beta$ (Cage)  | 2.61                  |

**Table ST1. Calculated distances between  $^1\text{H}$  close in space using NOE difference spectroscopy**

## 5. Time-evolution of the broad Visible excited state absorption signal

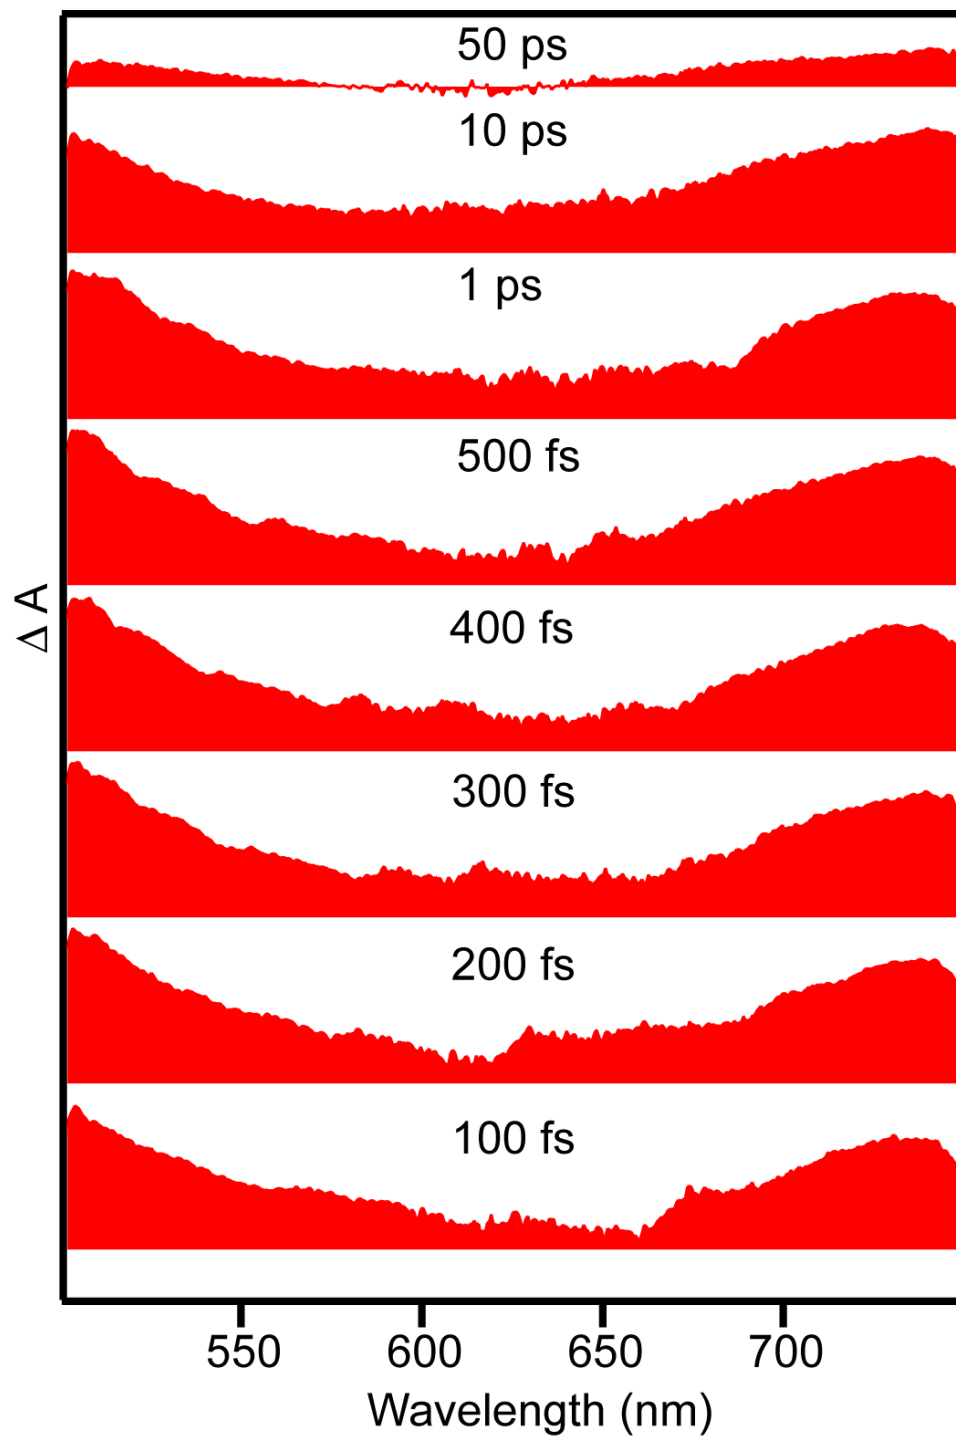

Figure S5. Time-evolution of the broad NIR excited state absorption signal in DMABN  $\subset$  Cage after excitation with  $\lambda_{\text{pump}} = 490$  nm.

## 6. Kinetics of excited state absorption signal in Visible

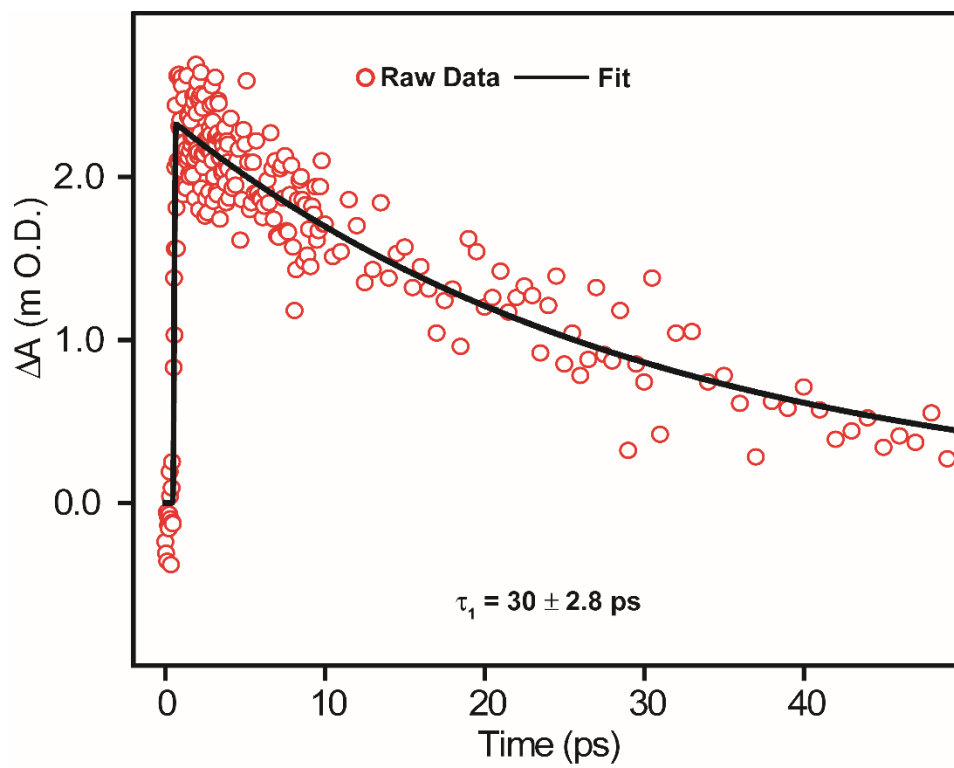

Figure S6. Kinetics of excited state absorption signal for DMABN  $\subset$  Cage at 545 nm after excitation with  $\lambda_{\text{pump}} = 490$  nm.

## 7. Time-evolution of the broad NIR excited state absorption signal

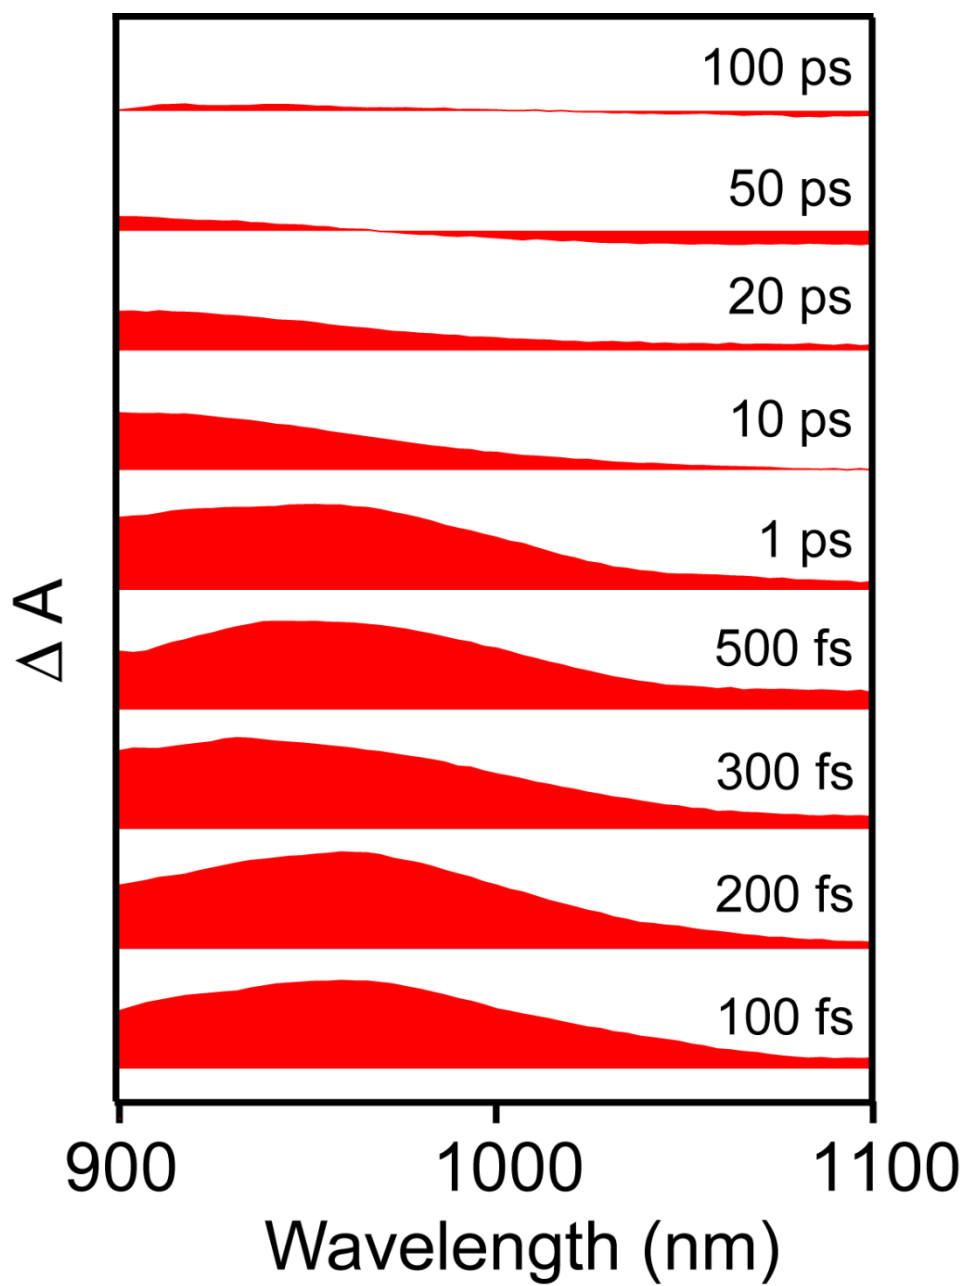

Figure S7. Time-evolution of the broad NIR excited state absorption signal in DMABN  $\subset$  Cage after excitation with  $\lambda_{\text{pump}} = 490$  nm.

## 8. Kinetics of excited state absorption signal in NIR

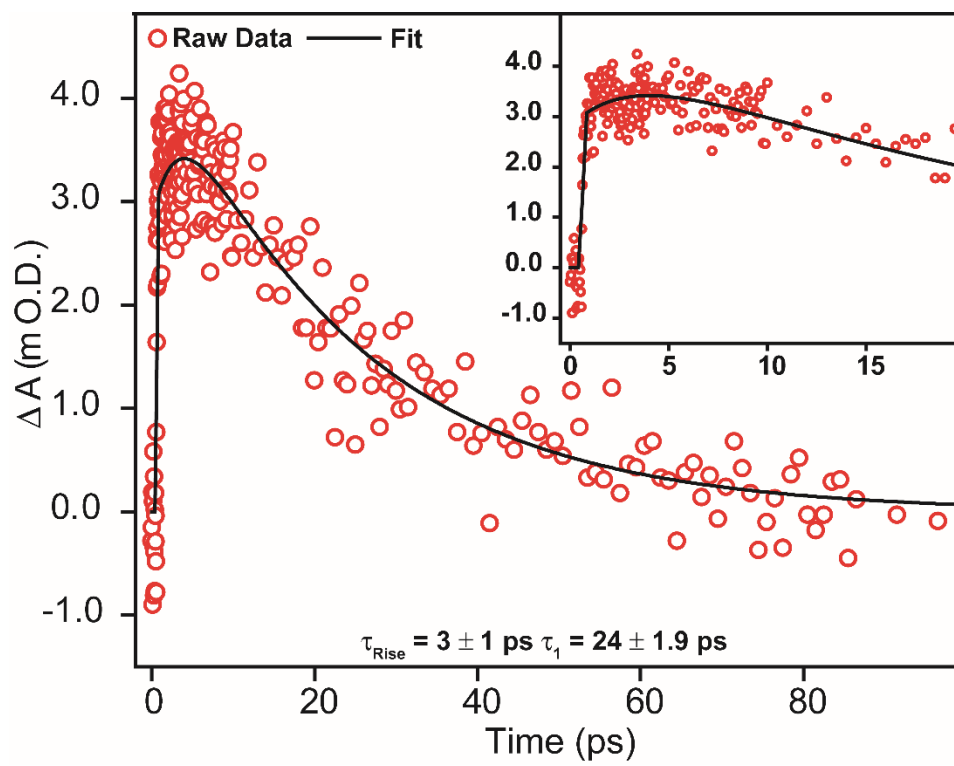

Figure S8. Kinetics of excited state absorption signal for DMABN  $\subset$  Cage at 880 nm after excitation with  $\lambda_{\text{pump}} = 490$  nm.

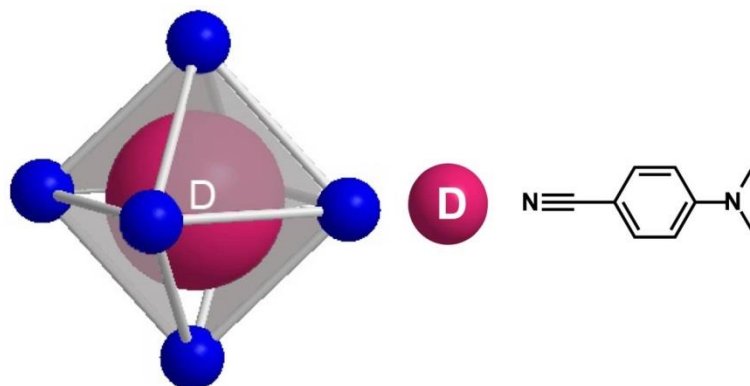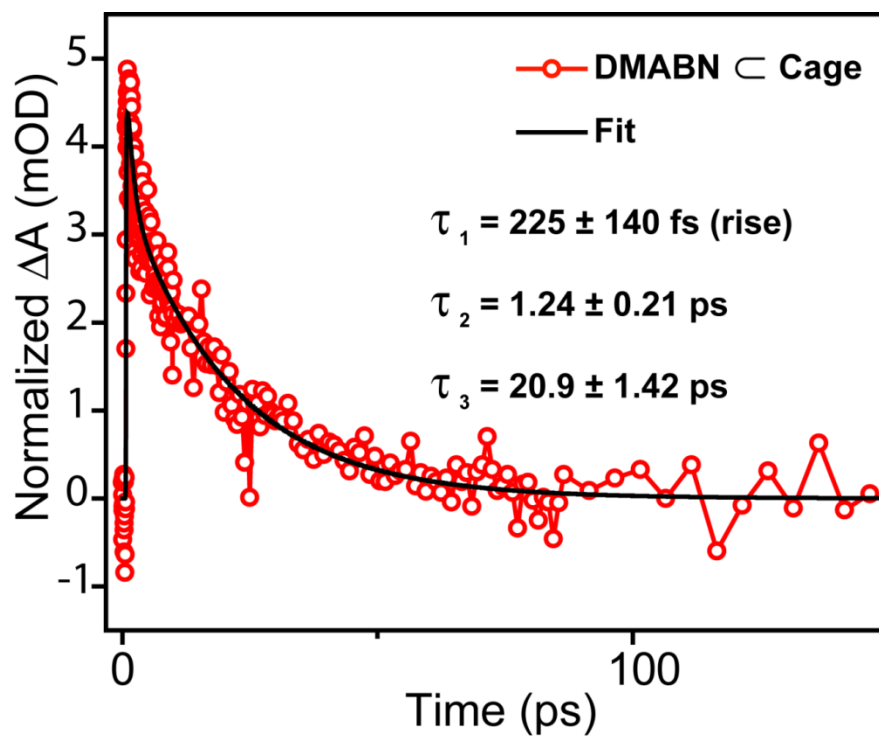

Figure S9. Kinetics of excited state absorption feature at 952 nm for DMABN  $\subset$  cage after excitation with 490 nm pump pulse. This data is also included the published manuscript R. Gera *et al. J. Am. Chem. Soc.* 2014, 136, 15909.
